# Supplementary material
Source: publisher figshare collection journal article supplement (https://frontiersin.figshare.com/ndownloader/files/24170120)
Supplement: Supplementary file [file 24170120]

## Supplementary Tables:

**Supplementary Table 1** Measurement dates for visual growth score (GS) and dry matter yield (DMY) data acquired at two locations (Ruakura and Darfield) and three years for training population TP1. Tick symbol (✓) = data collected and empty cell = no data collected.

| Measurement dates | GS - Ruakura | GS - Darfield | DMY - Ruakura | DMY - Darfield |
|-------------------|--------------|---------------|---------------|----------------|
| Jul-16            | ✓            |               |               |                |
| Aug-16            | ✓            |               |               |                |
| Sep-16            | ✓            | ✓             |               |                |
| Oct-16            |              | ✓             | ✓             | ✓              |
| Nov-16            | ✓            | ✓             |               |                |
| Dec-16            | ✓            | ✓             |               |                |
| Jan-17            | ✓            | ✓             |               |                |
| Feb-17            | ✓            | ✓             | ✓             | ✓              |
| Mar-17            | ✓            |               |               |                |
| Apr-17            | ✓            | ✓             |               |                |
| May-17            | ✓            | ✓             | ✓             | ✓              |
| Jun-17            | ✓            |               |               |                |
| Jul-17            |              |               |               |                |
| Aug-17            | ✓            | ✓             |               |                |
| Sep-17            | ✓            |               | ✓             | ✓              |
| Oct-17            | ✓            | ✓             |               |                |
| Nov-17            | ✓            | ✓             | ✓             | ✓              |
| Dec-17            | ✓            |               |               |                |
| Jan-18            | ✓            | ✓             |               |                |
| Feb-18            | ✓            |               | ✓             | ✓              |
| Mar-18            | ✓            |               |               |                |
| Apr-18            | ✓            | ✓             |               |                |
| May-18            | ✓            | ✓             | ✓             | ✓              |
| Jun-18            |              |               |               |                |
| Jul-18            | ✓            |               |               |                |
| Aug-18            | ✓            | ✓             |               |                |
| Sep-18            | ✓            |               | ✓             | ✓              |
| Oct-18            |              | ✓             |               |                |
| Nov-18            | ✓            |               | ✓             | ✓              |
| Dec-18            | ✓            |               |               |                |
| Jan-19            | ✓            | ✓             |               |                |
| Feb-19            | ✓            |               | ✓             | ✓              |
| Mar-19            |              |               |               |                |
| Apr-19            | ✓            | ✓             |               |                |
| May-19            | ✓            |               |               |                |

**Supplementary Table 2:** Training population TP1 was measured for dry matter yield (DMY) and growth scores (GS) at Ruakura for three years. Shown are family genetic variance ( $\sigma^2_g$ ), family-by-measure interactions ( $\sigma^2_{gm}$ ) and associated standard error (SE) estimated among perennial ryegrass half-sib families.  $\sigma^2_g$  is significant ( $P < 0.05$ ) for all traits. Data for genomic heritability ( $h^2_g$ ), predictive ability ( $r_p$ ) and bias are also provided.

| Trait           | $\sigma^2_g \pm \text{SE}$ | $\sigma^2_{gm} \pm \text{SE}$ | $h^2_g$ | $r_p$ | bias |
|-----------------|----------------------------|-------------------------------|---------|-------|------|
| DMY All Cuts    | 30.69 $\pm$ 2.571          | 3.25 $\pm$ 0.637              | 0.92    | 0.46  | 1.01 |
| DMY Spring      | 19.87 $\pm$ 2.836          | 0.81 $\pm$ 0.876              | 0.63    | 0.29  | 0.92 |
| DMY Late Spring | 24.95 $\pm$ 3.440          | 0.00 $\pm$ 0.000              | 0.62    | 0.31  | 0.98 |
| DMY Summer      | 24.88 $\pm$ 2.770          | 5.94 $\pm$ 1.075              | 0.77    | 0.43  | 1.02 |
| DMY Autumn      | 14.91 $\pm$ 1.975          | 6.97 $\pm$ 0.980              | 0.66    | 0.47  | 1.02 |
| GS All Cuts     | 0.72 $\pm$ 0.053           | 0.22 $\pm$ 0.008              | 0.96    | 0.62  | 1.02 |
| GS Spring       | 0.35 $\pm$ 0.04            | 0.01 $\pm$ 0.012              | 0.73    | 0.25  | 0.89 |
| GS Late Spring  | 0.27 $\pm$ 0.038           | 0.02 $\pm$ 0.020              | 0.61    | 0.38  | 1.04 |
| GS Summer       | 0.61 $\pm$ 0.054           | 0.19 $\pm$ 0.016              | 0.89    | 0.58  | 1.04 |
| GS Autumn       | 1.07 $\pm$ 0.088           | 0.26 $\pm$ 0.017              | 0.92    | 0.62  | 1.03 |
| GS Winter       | 0.33 $\pm$ 0.039           | 0.23 $\pm$ 0.020              | 0.74    | 0.36  | 0.99 |

**Supplementary Table 3:** Training population TP1 was measured for dry matter yield (DMY) and growth scores (GS) at Darfield for three years. Shown are family genetic variance ( $\sigma^2_g$ ), family-by-measure interactions ( $\sigma^2_{gm}$ ) and associated standard error (SE) estimated among perennial ryegrass half-sib families.  $\sigma^2_g$  is significant ( $P < 0.05$ ) for all traits. Data for genomic heritability ( $h^2_g$ ), predictive ability ( $r_p$ ) and bias are also provided.

| Trait           | $\sigma^2_g \pm \text{SE}$ | $\sigma^2_{gm} \pm \text{SE}$ | $h^2_g$ | $r_p$ | bias |
|-----------------|----------------------------|-------------------------------|---------|-------|------|
| DMY All Cuts    | 19.97 $\pm$ 2.077          | 7.91 $\pm$ 1.051              | 0.82    | 0.24  | 0.85 |
| DMY Spring      | 5.12 $\pm$ 1.073           | 5.81 $\pm$ 1.438              | 0.31    | 0.25  | 0.85 |
| DMY Late Spring | 8.50 $\pm$ 2.386           | 7.05 $\pm$ 2.424              | 0.29    |       |      |
| DMY Summer      | 19.47 $\pm$ 3.261          | 12.86 $\pm$ 2.365             | 0.55    | 0.40  | 0.98 |
| DMY Autumn      | 16.78 $\pm$ 3.383          | 0.00 $\pm$ 0.000              | 0.40    | 0.27  | 0.91 |
| GS All Cuts     | 0.10 $\pm$ 0.011           | 0.12 $\pm$ 0.009              | 0.78    | 0.30  | 0.89 |
| GS Spring       | 0.02 $\pm$ 0.007           | 0.15 $\pm$ 0.017              | 0.16    | 0.20  | 0.80 |
| GS Late Spring  | 0.03 $\pm$ 0.017           | 0.19 $\pm$ 0.032              | 0.09    | 0.27  | 0.92 |
| GS Summer       | 0.13 $\pm$ 0.020           | 0.14 $\pm$ 0.016              | 0.56    | 0.29  | 0.90 |
| GS Autumn       | 0.06 $\pm$ 0.013           | 0.04 $\pm$ 0.015              | 0.38    | 0.25  | 0.85 |
| GS Winter       | 0.11 $\pm$ 0.025           | 0.02 $\pm$ 0.022              | 0.30    |       |      |

**Supplementary Table 4:** Training population TP2 was measured for nutritive traits. Each trait was assessed for predictive ability ( $r_p$ ) at Lincoln and Aorangi and bias of the predictions was estimated.

| Trait     | Lincoln $r_p$ | Lincoln Bias | Aorangi $r_p$ | Aorangi Bias |
|-----------|---------------|--------------|---------------|--------------|
| ADF       | -0.06         | -0.08        | 0.29          | 0.91         |
| NDF       | 0.02          | 0.30         | 0.35          | 0.97         |
| DOMD      | -0.02         | 0.20         | 0.25          | 0.94         |
| CP        | 0.14          | 0.66         | 0.21          | 0.94         |
| LMW WSC   | -0.03         | -0.34        | 0.33          | 0.89         |
| HMW WSC   | 0.13          | 0.83         | 0.56          | 1.04         |
| Total WSC | 0.08          | 0.52         | 0.46          | 0.99         |

**Supplementary Table 5:** Pearson correlation coefficient between combined dry matter yield (DMY All Cuts) and growth scores (GS Spring and GS All Cuts) evaluated amongst individual populations (Pop B1 – Pop B5) in training population TP1.

| Population | Trait        | GS Spring | GS All Cuts |
|------------|--------------|-----------|-------------|
| Pop B1     | DMY All Cuts | 0.69      | 0.91        |
| Pop B2     | DMY All Cuts | 0.59      | 0.83        |
| Pop B3     | DMY All Cuts | 0.44      | 0.78        |
| Pop B4     | DMY All Cuts | 0.50      | 0.82        |
| Pop B5     | DMY All Cuts | 0.75      | 0.95        |

**Supplementary Table 6:** Pearson correlation coefficient between Total WSC and CP and NDF evaluated amongst individual populations (Pop I – Pop V) in training population TP2.

| Population | Trait     | CP    | NDF   |
|------------|-----------|-------|-------|
| Pop I      | Total WSC | -0.46 | -0.45 |
| Pop II     | Total WSC | -0.27 | -0.64 |
| Pop III    | Total WSC | -0.22 | -0.68 |
| Pop IV     | Total WSC | -0.43 | -0.56 |
| Pop V      | Total WSC | -0.23 | -0.69 |

## Supplementary Figures:

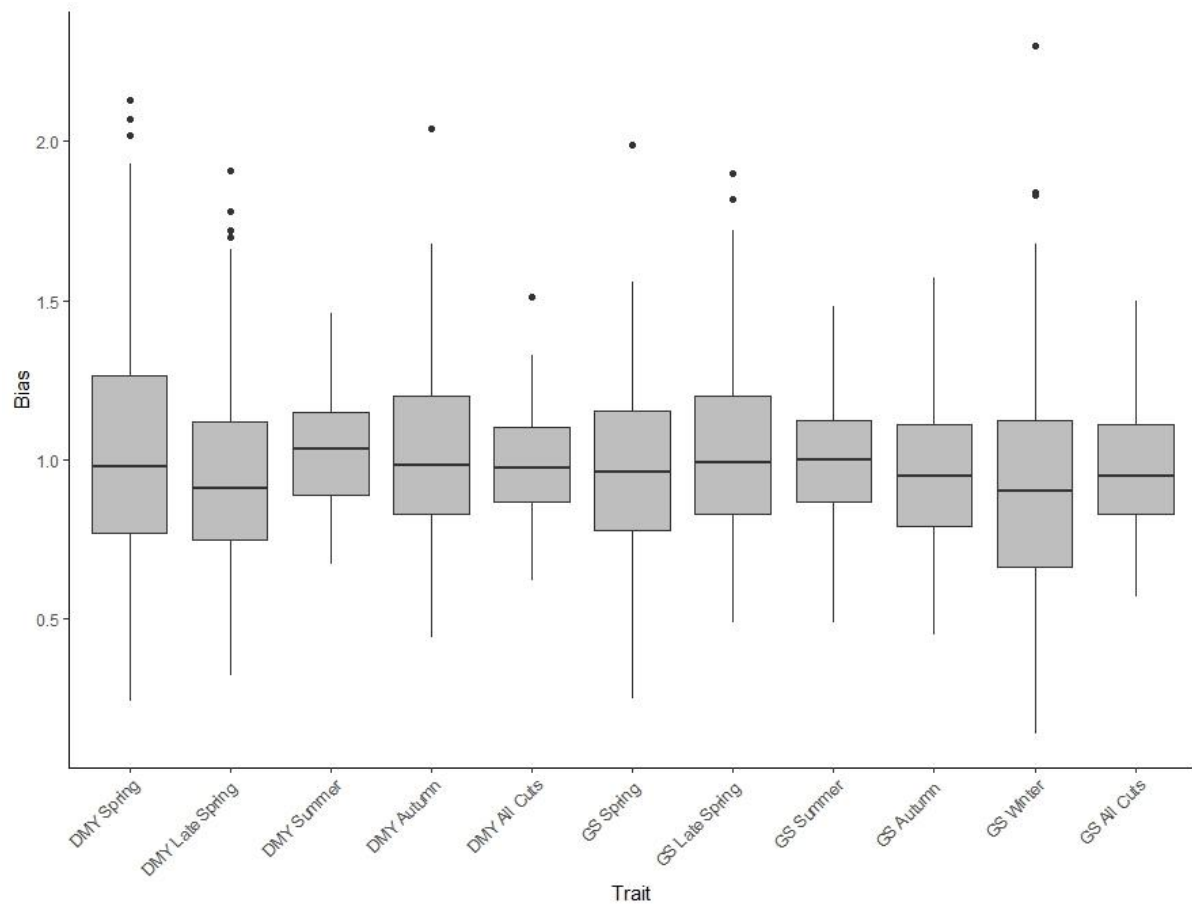

**Supplementary Figure 1** Bias for combined (All Cuts) and seasonal dry matter yield (DMY) and growth scores (GS) measured in training population TP1 using the single trait genomic prediction model (ST-CV1 approach) based on across location best linear unbiased predictors (BLUPs).

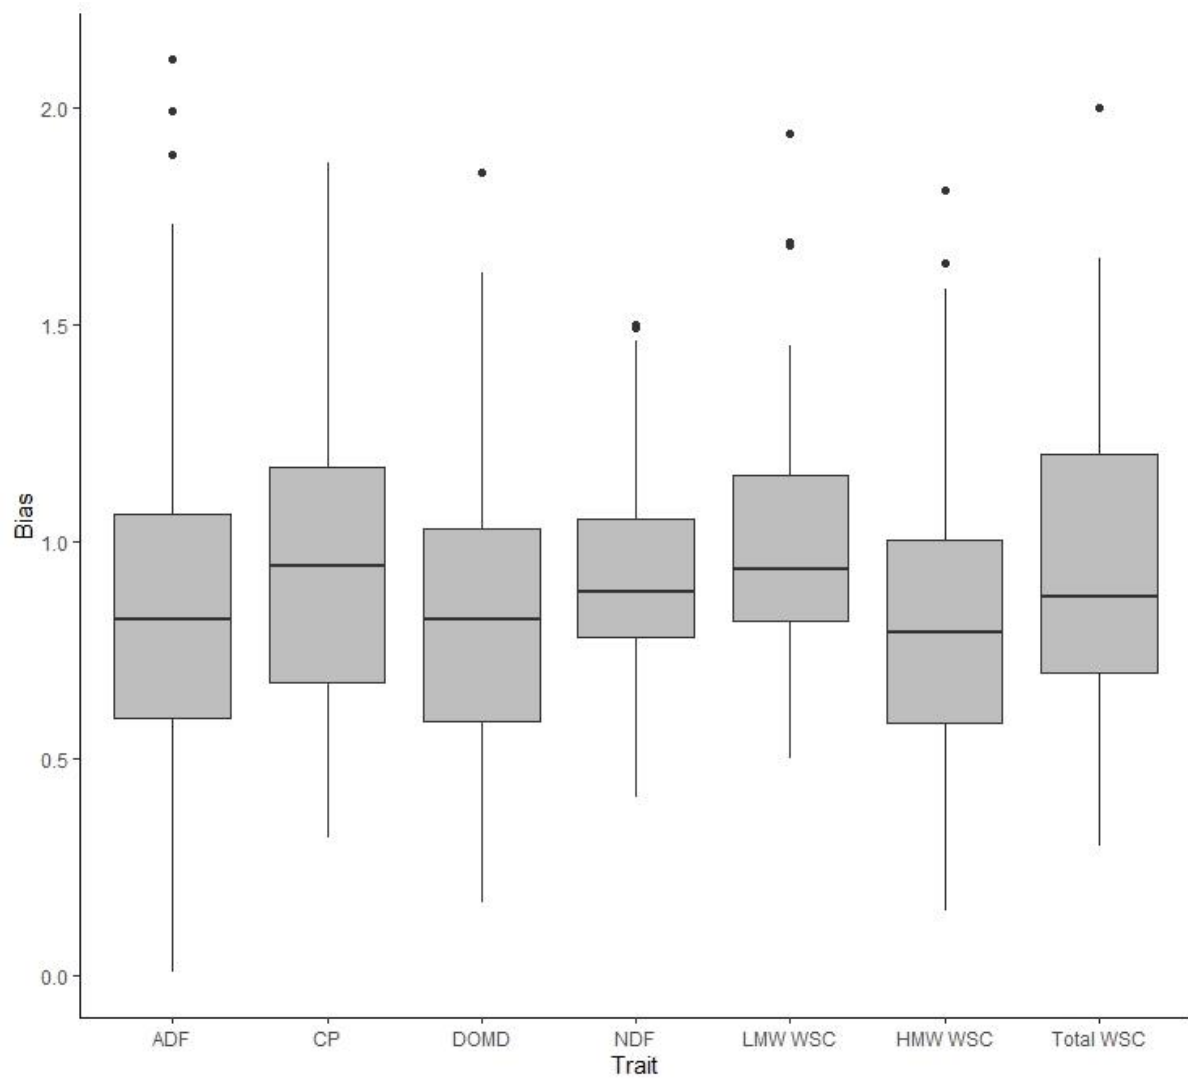

**Supplementary Figure 2** Bias for nutritive traits measured in training population TP2 using the single trait genomic prediction model (ST-CV1 approach) based on across location best linear unbiased predictors (BLUPs).

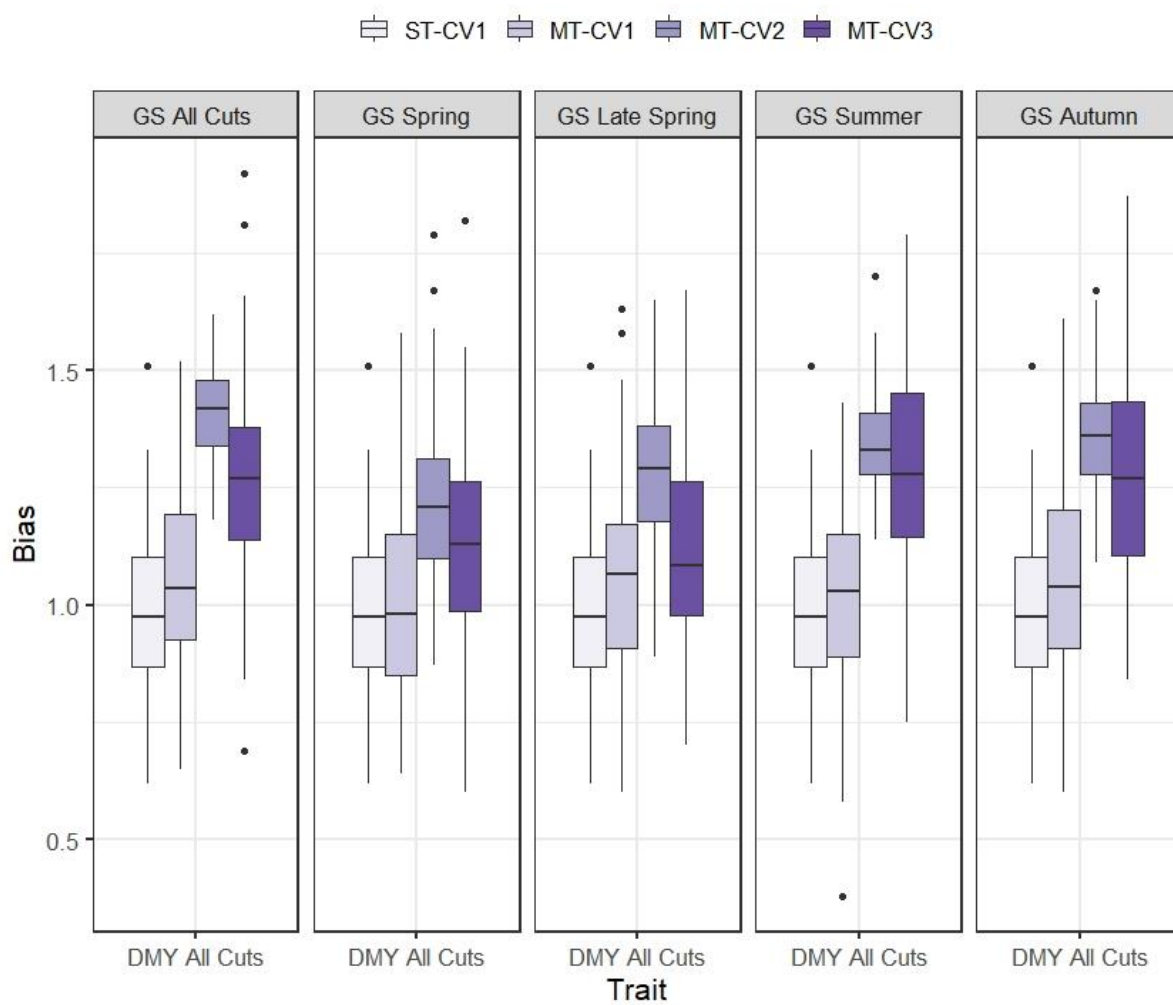

**Supplementary Figure 3** Bias for DMY All Cuts measured in training population TP1 using single trait (ST-CV1) and multi-trait (MT-CV1, MT-CV2 and MT-CV3) genomic prediction approaches.

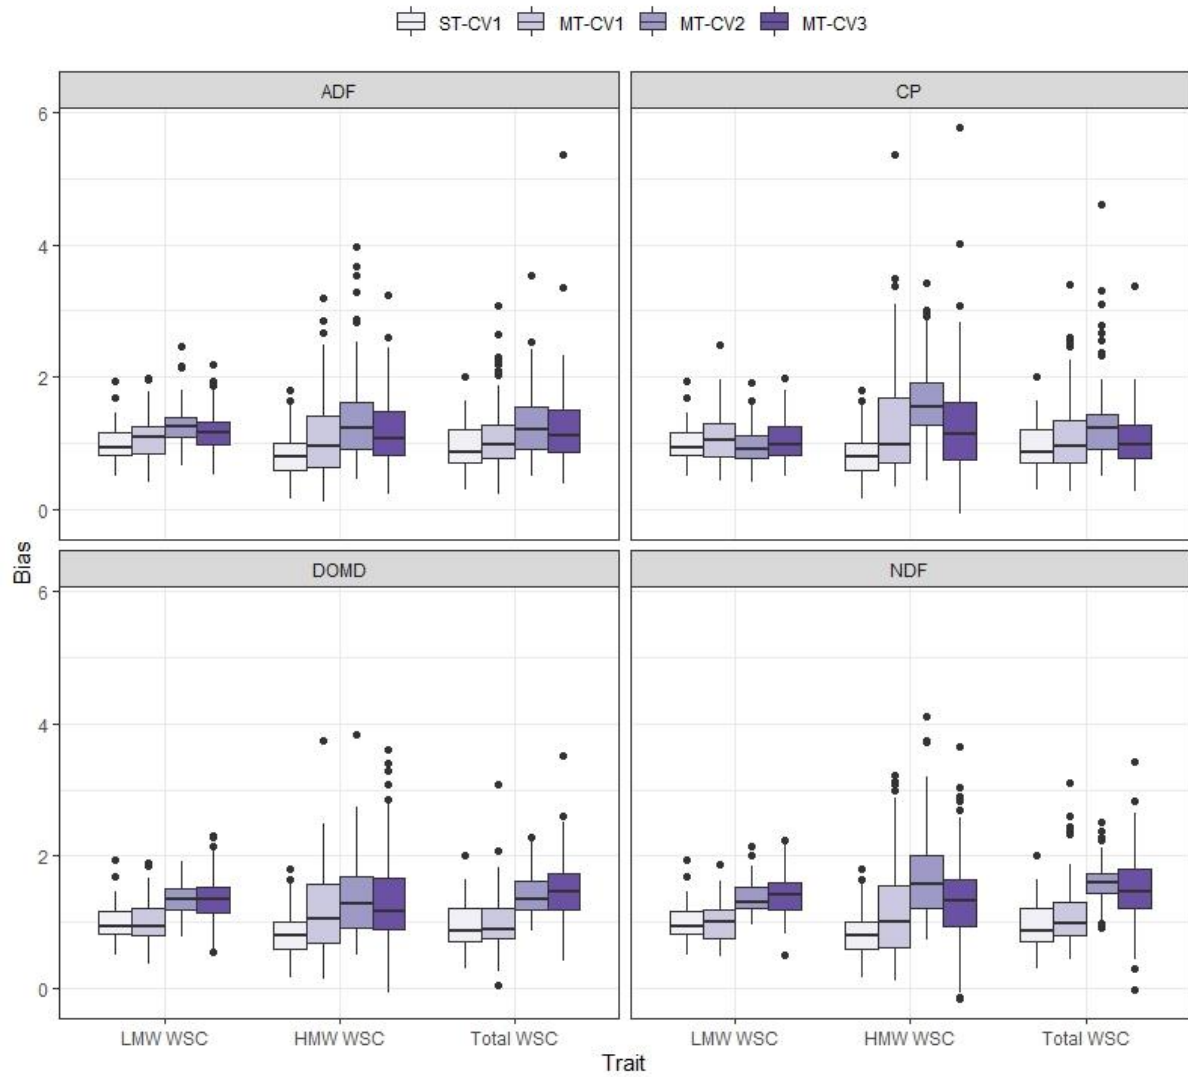

**Supplementary Figure 4** Bias for LMW, HMW and Total WSC traits measured in training population TP2 using single trait (ST-CV1) and multi-trait (MT-CV1, MT-CV2 and MT-CV3) genomic prediction approaches.

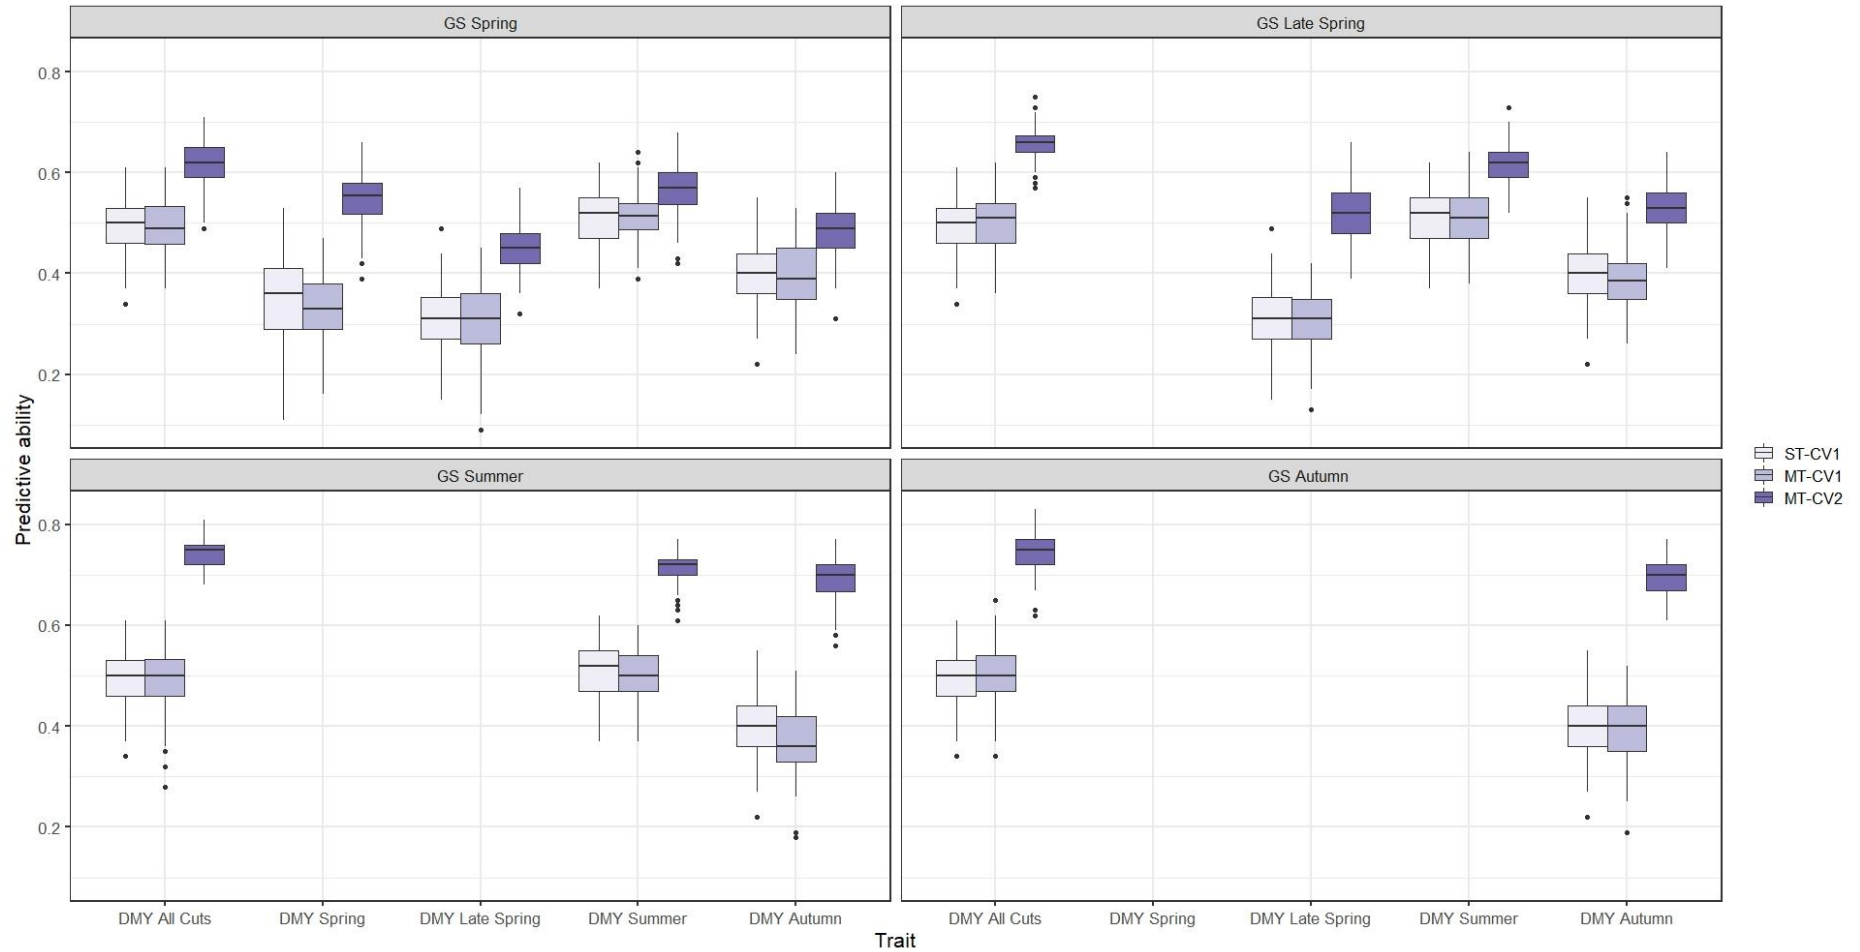

**Supplementary Figure 5:** Predictive ability for mean dry matter yield in TP1 from all seasonal harvests (DMY All Cuts) and for individual seasonal DMY harvests (Spring, Late spring, Summer, Autumn) using single-trait (ST-CV1) and multi-trait (MT-CV1 and MT-CV2) genomic prediction models. MT genomic prediction models included mean growth scores (GS) measured at each seasonal period as secondary traits.



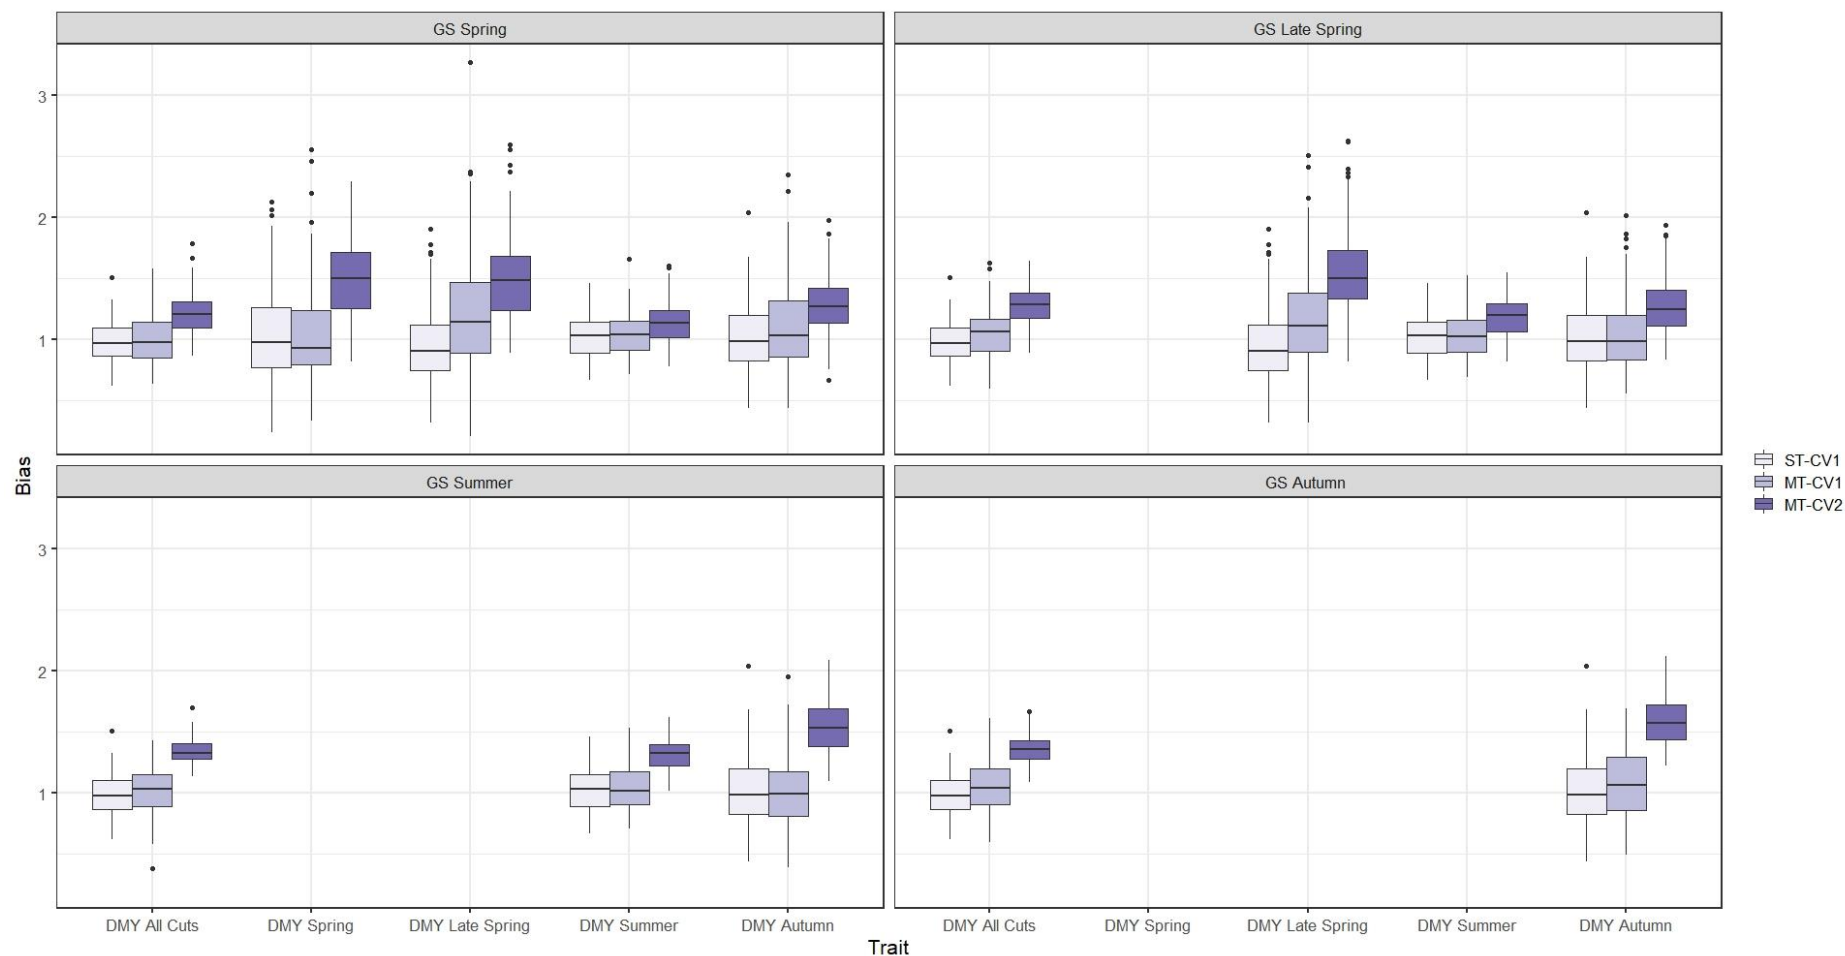

**Supplementary Figure 6:** Bias for mean dry matter yield in TP1 from all seasonal harvests (DMY All Cuts) and for individual seasonal DMY harvests (Spring, Late spring, Summer, Autumn) using single-trait (ST-CV1) and multi-trait (MT-CV1 and MT-CV2) genomic prediction models. MT genomic prediction models included mean growth scores (GS) measured at each seasonal period as secondary traits.
